# Supplementary figures and images for: Water Level Fluctuation Rather than Eutrophication Induced the Extinction of Submerged Plants in Guizhou’s Caohai Lake: Implications for Lake Management
Source: MDPI journal article supplement (doi:10.3390/w16050772), 2024-03-05

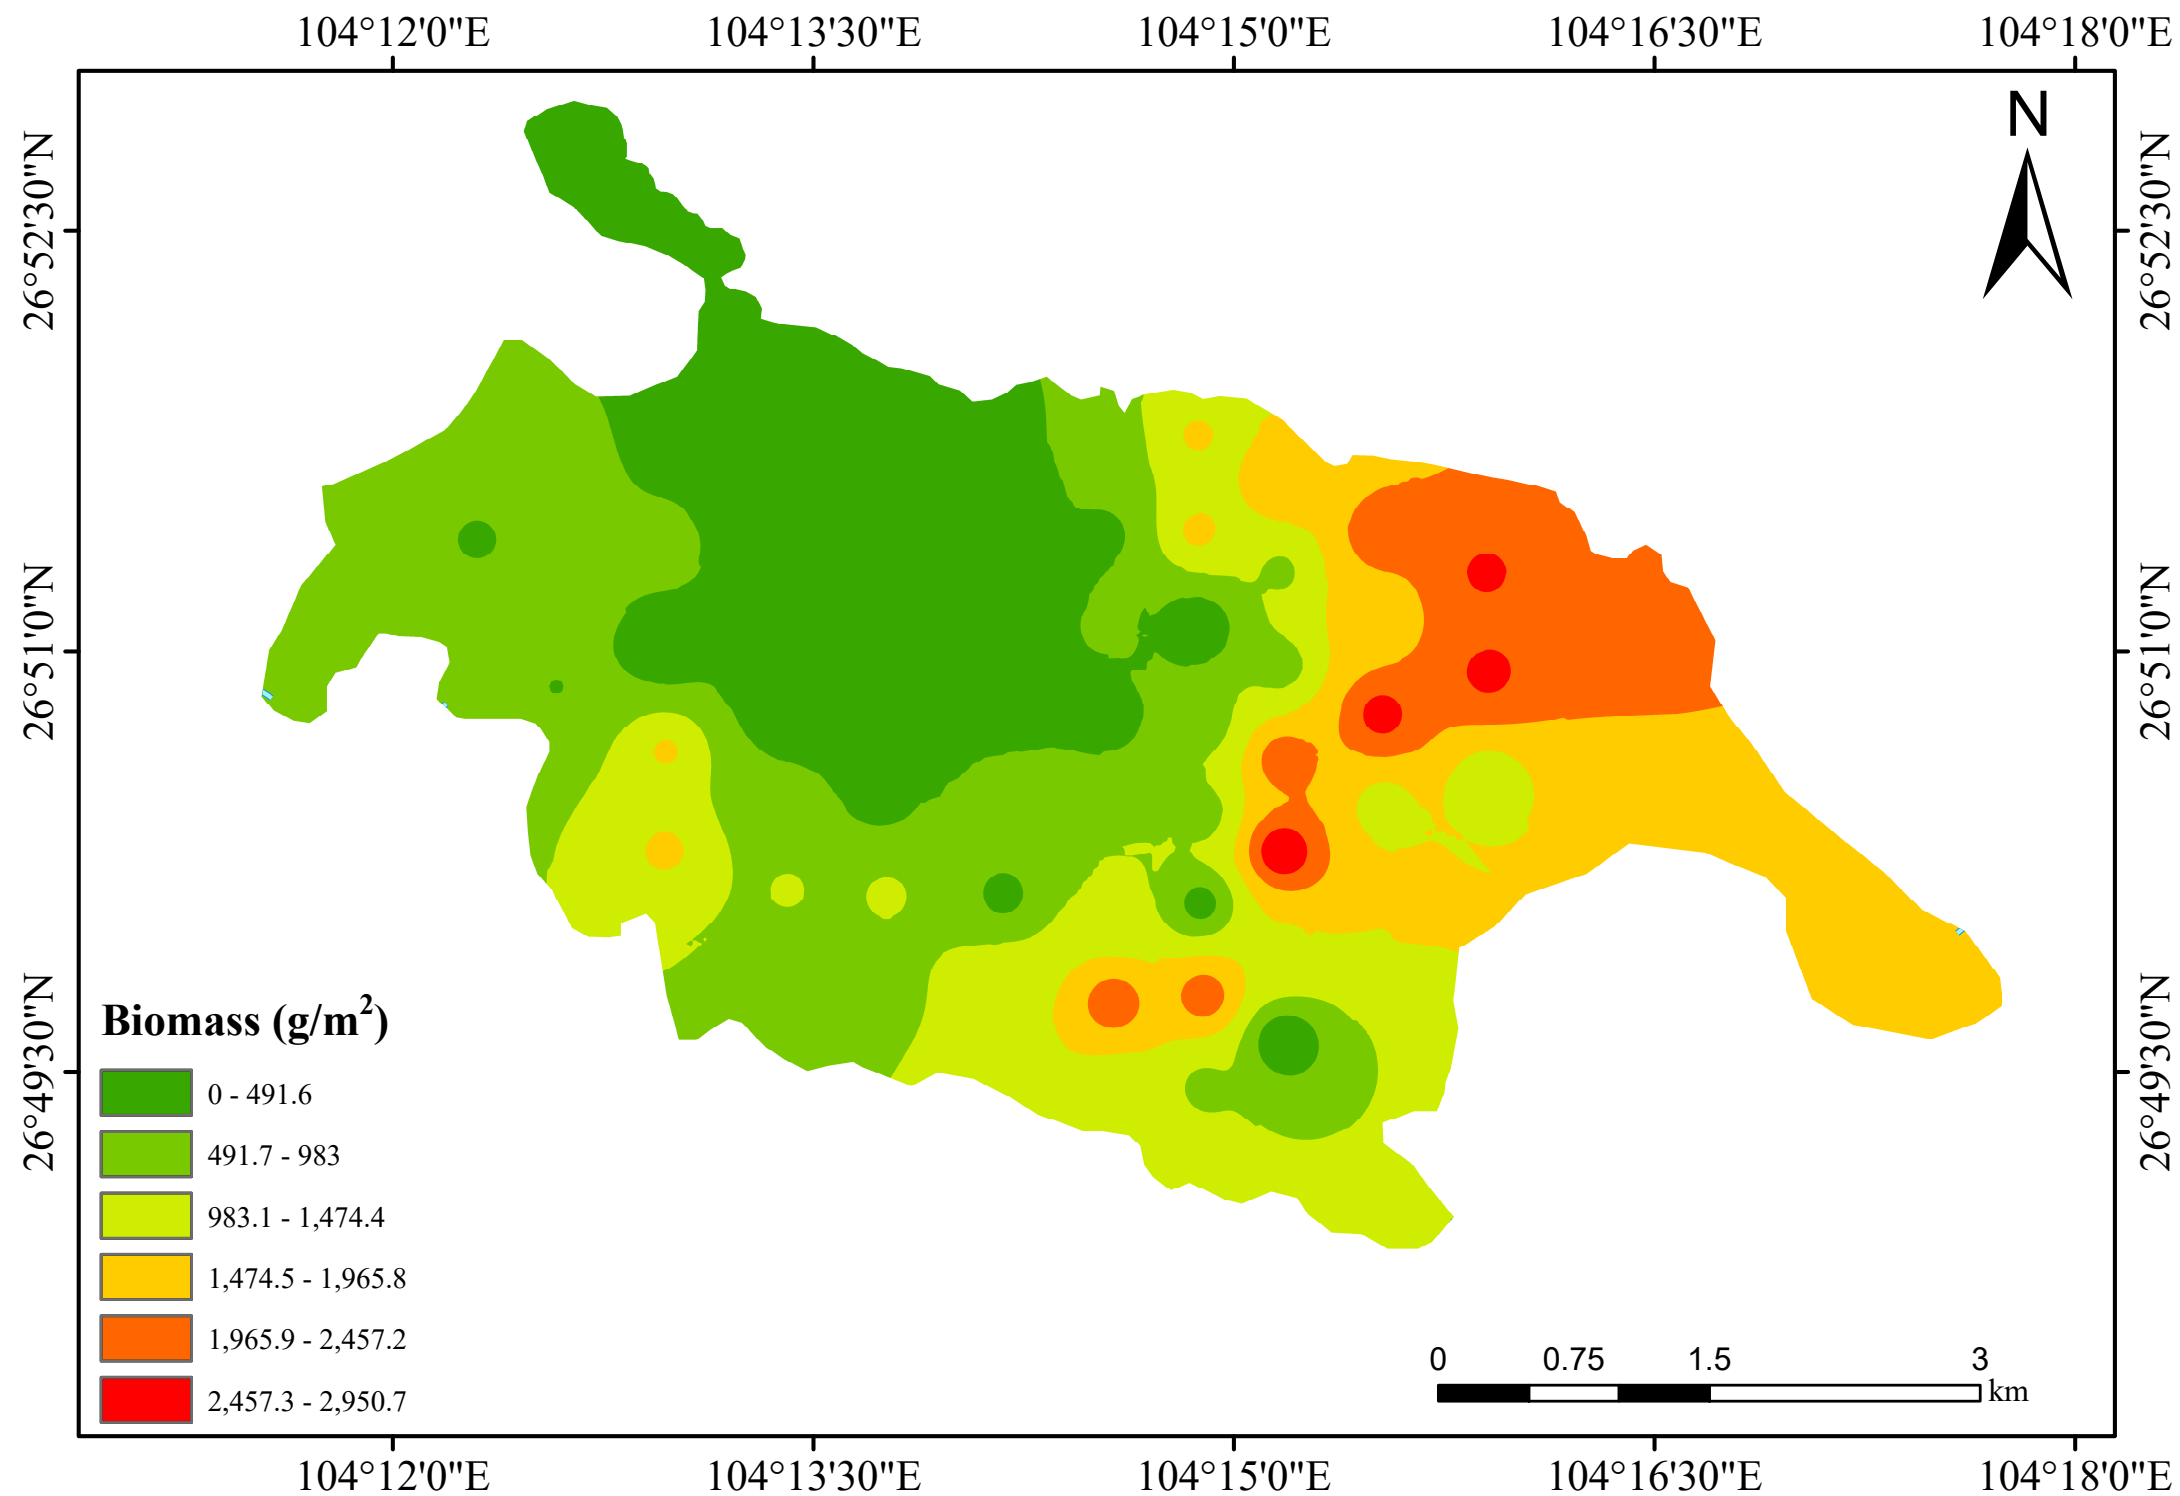

Supplement: s1 [file s1]

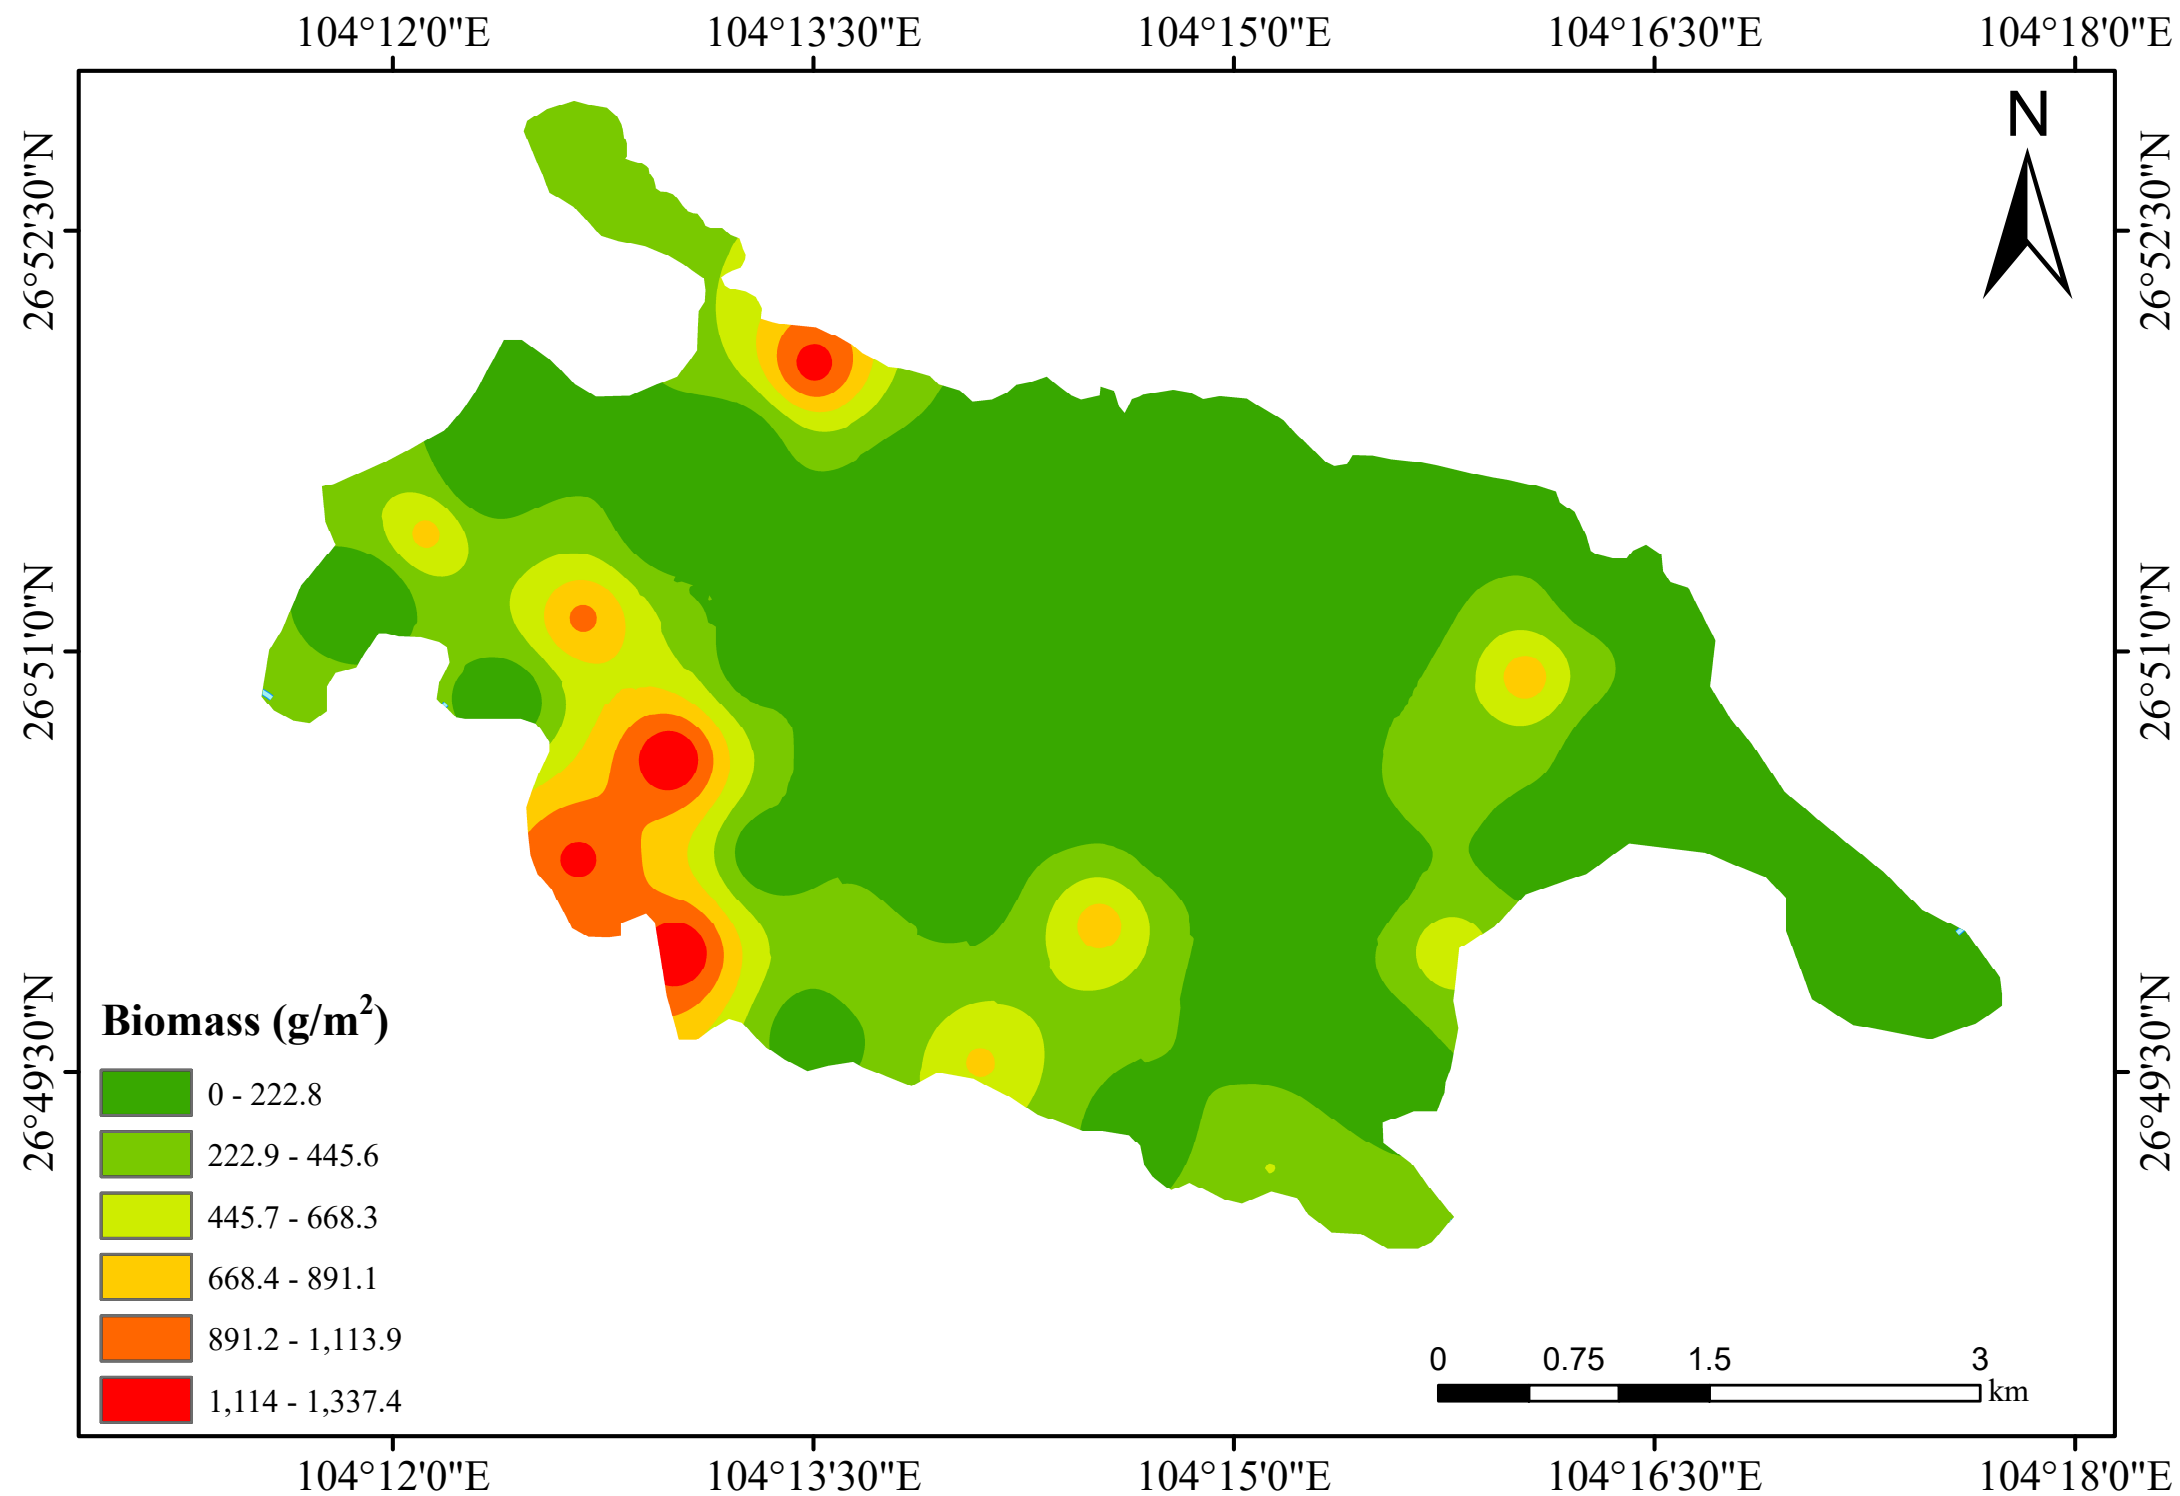

Supplement: s1 [file s1]

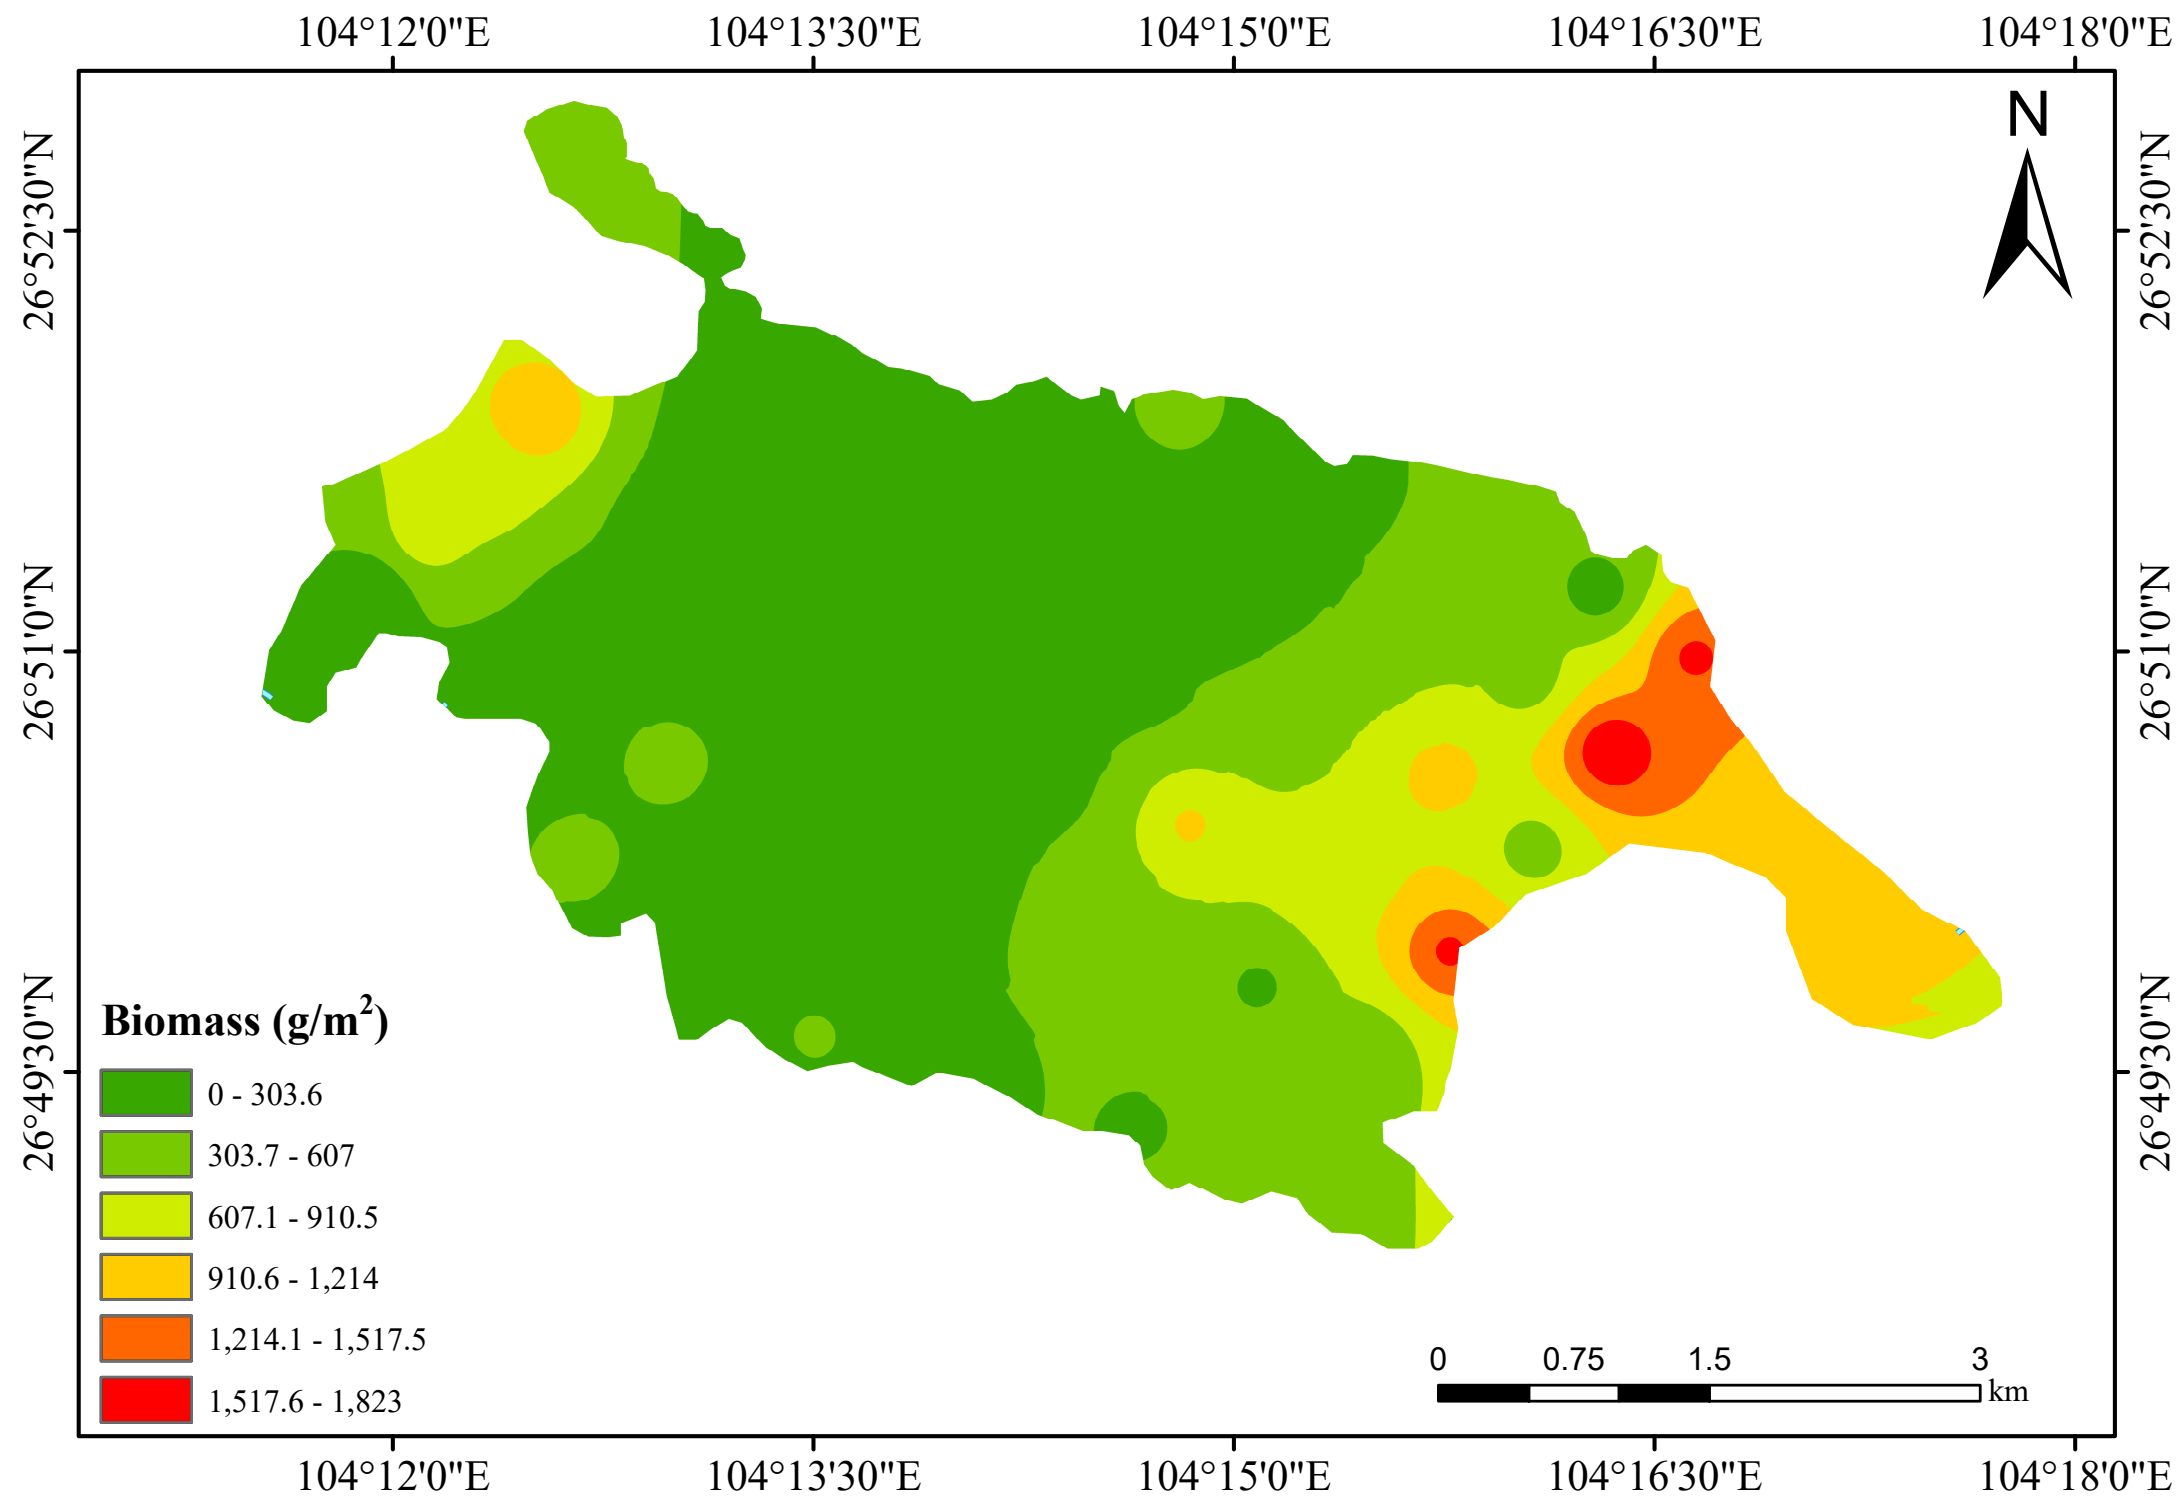

Supplement: s1 [file s1]
